# Supplementary material
Source: ML conference proceedings conference paper supplement (https://www.ecva.net/papers/eccv_2020/papers_ECCV/html/123540324_ECCV_2020_paper.php)
Supplement: Supplementary file 3 [file 123540324-supp.zip]

Archive with 6 entries (6 files):
- DLow_supp.mp4
- __MACOSX/._DLow_supp.mp4
- DLow_supp.pdf
- __MACOSX/._DLow_supp.pdf
- README.txt
- __MACOSX/._README.txt
