# Supplementary material
Source: ML conference proceedings conference paper supplement (https://www.ecva.net/papers/eccv_2020/papers_ECCV/html/123540324_ECCV_2020_paper.php)
Supplement: Supplementary file 3 [file 123540324-supp.zip › README.txt]

The supplementary materials include:
	- a document DLow_supp.pdf
	- a video DLow_video.mp4

*The video is encoded with H.264, which is natively supported on recent Mac OS and Windows.
